# Supplementary material
Source: PubMed Central journal article supplement (PMC3672470)
Supplement: NIHMS468330-supplement-1.pdf [file NIHMS468330-supplement-1.pdf]

## SUPPLEMENTAL MATERIAL

### **Tumor Necrosis Factor Receptor Associated Factor 2 Signaling Provokes Adverse Cardiac Remodeling in the Adult Mammalian Heart**

#### **Methods/Results**

##### **Characterization of Founder Lines of MHC-TRAF2 Mice**

The TRAF2 cDNA used for to generate the MHC-TRAF2 construct was the generous gift of Dr. Yongwon Choi.<sup>1</sup> To facilitate separation of endogenous TRAF2 from the TRAF2 that was driven by the alpha-myosin heavy chain promoter, we FLAG-tagged the TRAF-2 construct using an EcoRV cleavage site with the primer sequence: CTAGGA TAT CCG TTT AGT GAA CCG TCA GAA TTG ATC TAC CAT GGA CTA CAA AGACGA TGA CGA CAA GGC TGC AGC CAG TGT GAC. The FLAG-tag was inserted at the N-terminus using a NotI cleavage site with the primer sequence: ACG TGC GGC CGC CTAGAG TCC TGT TAG GTC. The transgene construct was injected into single cell embryos of FVB mice at the Baylor College of Medicine transgenic core facility. Founder lines of MHC-TRAF2 transgenic mice (FVB background) were identified by PCR and confirmed by Southern blotting using a 286 bp probe targeted to exon 8 of the TRAF2 gene (supplemental Figure 1A). Western blotting was performed to confirm the expression of TRAF2 protein in the hearts of 12 week MHC-TRAF<sub>HC</sub> mouse hearts (supplemental Figure 1B) using an anti-TRAF2 antibody (sc-877, Santa Cruz Biotechnology, Santa Cruz, CA). Immunohistochemical staining of founder lines showed that TRAF2 protein was localized diffusely throughout the cytoplasm in MHC-TRAF2 mouse hearts compared to littermate control mice (supplemental Figure 1C). We obtained three founder lines: 329W (7 copies of TRAF2 transgene); 330W (10 copies of transgene); 335W (24 copies of transgene).

Supplemental Table 1 displays the morphometrics of the MHC-TRAF2 founder lines of mice. The 329W line, with the lowest copy of the transgene, referred to as MHC-TRAF2<sub>LC</sub>, has been characterized in detail and reported previously.<sup>2</sup> Mice with 10 and 24 copies of the TRAF2 transgene developed an increased heart-weight-to-body weight ratio and a dilated cardiac phenotype by 12 weeks of age. Lines of mice that

expressed 24 copies of the transgene (referred to here as MHC-TRAF2<sub>HC</sub> mice) were found to express ~ two-fold higher levels of TRAF2 protein compared to mice that expressed 7 or 10 copies by Western blot analysis (supplemental Figure 1B). Mice expressing 24 copies of the TRAF2 transgene (referred to here as MHC-TRAF2<sub>HC</sub>) were selected for further study.

**LV Structure and Function.** LV structure and function were assessed using 2D directed M-mode echocardiography as described previously.<sup>3</sup> Anesthesia was induced using 1% isoflurane, and was maintained using 0.5% isoflurane. The heart rate was maintained at > 400 beats per minute by adjusting the level of anesthesia. All echocardiographic measurements were performed by an investigator who was blinded to the experimental group. LV contractility of 12 week MHC-TRAF2<sub>HC</sub> and LM mouse hearts was measured ex-vivo using a buffer perfused Langendorff apparatus, as described.<sup>4</sup> All hearts were paced at 420 beats per minute with pacing electrodes placed on the right atrium. Functional data were recorded at 1 KHz on a data acquisition system (Power Lab, AD Instruments, Colorado Spring, CO), and left ventricular +dP/dt and -dP/dt were determined.

**Extracellular Matrix.** Deparaffinized sections of perfusion fixed hearts from 4, 8 and 12 week old MHC-TRAF2<sub>HC</sub> and littermate control mice were stained using the picosirius red technique, as described (see data supplement for details).<sup>5</sup> The sections were imaged using polarized light microscopy, and the percent area of extracellular picosirius red staining was computed using commercially available software (Metavue, Visitron systems, Germany) by examining 8 random fields within the mid-myocardium in order to exclude large epicardial arteries and/or veins, as well as any cutting and/or compression artifacts. MMP activity from 4, 8 and 12 week old MHC-TRAF2<sub>HC</sub> and LM control mouse hearts were obtained using gelatin zymography, as previously described (see data supplement for details).<sup>6</sup> The intensity of the zymographic bands was quantified by image analysis software (Image-J, NIH). Levels of TIMP-1 were measured in myocardial extracts from MHC-TRAF2<sub>HC</sub> mice and littermate controls at 4, 8 and 12 weeks of by ELISA (Amersham RPN 2611), according to manufacturer's recommendations.<sup>5</sup>

## References

1. Lee SY, Lee SY, Kandala G, Liou ML, Liou HC, Choi Y: CD30/TNF receptor-associated factor interaction: NF-kappa B activation and binding specificity. *Proc Natl Acad Sci U S A* 1996; 93:9699-9703.
2. Burchfield JS, Dong JW, Sakata Y, Gao F, Tzeng HP, Topkara VK, Entman ML, Sivasubramanian N, Mann DL: The Cytoprotective Effects of Tumor Necrosis Factor are Conveyed Through Tumor Necrosis Factor Receptor Associated Factor 2 in the Heart. *Circ Heart Fail* 2010; 3:157-164.
3. Nemoto S, Vallejo JG, Knuefermann P, Misra A, DeFreitas G, Carabello BA, Mann DL: *Escheria coli* lipopolysaccharide-induced left ventricular dysfunction: the role of toll-like receptor-4 in the adult mammalian heart. *Am J Physiol* 2002; 282:H2316-H2323.
4. Sakata Y, Dong JW, Vallejo JG, Huang CH, Baker JS, Tracey KJ, Tacheuchi O, Akira S, Mann DL: Toll-like receptor 2 modulates left ventricular function following ischemia-reperfusion injury. *Am J Physiol Heart Circ Physiol* 2007; 292:H503-H509.
5. Sivasubramanian N, Coker ML, Kurrelmeyer K, DeMayo F, Spinale F.G., Mann DL: Left ventricular remodeling in transgenic mice with cardiac restricted overexpression of tumor necrosis factor. *Circulation* 2001; 2001:826-831.
6. Diwan A, Dibbs Z, Nemoto S, DeFreitas G, Carabello BA, Sivasubramanian N, Wilson EM, Spinale FG, Mann DL: Targeted overexpression of noncleavable and secreted forms of tumor necrosis factor provokes disparate cardiac phenotypes. *Circulation* 2004; 109:262-268.

**Supplemental Table 1**  
**Characterization of founder lines of mice with targeted overexpression of TRAF2**

| Mice                    | Copy # | HW (mg)     | BW (g)   | HW/BW (mg/g) | Cardiac Phenotype |
|-------------------------|--------|-------------|----------|--------------|-------------------|
| MHC-TRAF2 <sub>LC</sub> | 7      | 132.0±7.3*  | 28.9±1.6 | 4.6±0.2*     | Hypertrophy       |
| LM                      | -      | 120.7±4.4   | 30.1±1.5 | 4.0±0.1      |                   |
| MHC-TRAF2 <sub>IC</sub> | 10     | 184.3±0.01* | 25.7±1.2 | 7.2±0.5*     | Dilated           |
| LM                      | -      | 117.7±0.01  | 27.9±2.6 | 4.2±0.1      |                   |
| MHC-TRAF2 <sub>HC</sub> | 24     | 130.5±5.5*  | 25.5±0.8 | 5.3±0.1*     | Dilated           |
| LM                      | -      | 112.9±5.4   | 24.1±0.8 | 4.5±0.1      |                   |

(Data are expressed as mean ± SEM. Necropsy data for heart weight (HW), body weight (BW), heart-weight-to-body-weight-ratio (HW/BW) and phenotype of 12 week old mice with varying copies of the TRAF2 transgene and 12 week littermate (LM) controls. (n ≥ 5 mice per group; \* = p < = 0.05 vs. littermate control)

**Supplemental Table 2: Changes in Gene Expression in MHC-TRAF2<sub>HC</sub> Mice**

| Symbol | Gene Name                                                            | Expression level<br>(relative to LM) | p value                |
|--------|----------------------------------------------------------------------|--------------------------------------|------------------------|
|        |                                                                      | <b>Increased</b>                     |                        |
| MYH7   | myosin, heavy chain 7, cardiac muscle, beta                          | 14.92                                | 7.61x10 <sup>-05</sup> |
| TGFB3  | transforming growth factor, beta 3                                   | 4.00                                 | 9.82x10 <sup>-06</sup> |
| TIMP1  | Tissue inhibitor of metalloproteinase 1                              | 3.39                                 | 2.82x10 <sup>-3</sup>  |
| MMP23  | Matrix metalloproteinase 23                                          | 2.88                                 | 5.252x10 <sup>-3</sup> |
| CACNB1 | calcium channel, voltage-dependent, beta 1 subunit                   | 2.60                                 | 8.49x10 <sup>-04</sup> |
| TGFB2  | transforming growth factor, beta 2                                   | 2.29                                 | 3.88x10 <sup>-02</sup> |
| DES    | Desmin                                                               | 2.22                                 | 9.84x10 <sup>-05</sup> |
| ITGA11 | integrin, alpha 11                                                   | 2.05                                 | 2.53x10 <sup>-02</sup> |
| PRKB2  | protein kinase, AMP-activated, beta 2 non-catalytic subunit          | 1.81                                 | 7.88x10 <sup>-3</sup>  |
| COL1A1 | collagen, type I, alpha 1                                            | 1.77                                 | 1.70x10 <sup>-2</sup>  |
| COL3A1 | collagen, type III, alpha 1                                          | 1.77                                 | 3.24x10 <sup>-2</sup>  |
| MMP14  | matrix metalloproteinase 14                                          | 1.65                                 | 2.96x10 <sup>-2</sup>  |
| MMO2   | matrix metalloproteinase 2                                           | 1.60                                 | 2.66x10 <sup>-2</sup>  |
| ITGB5  | integrin, beta 5                                                     | 1.51                                 | 4.16x10 <sup>-02</sup> |
| LMNA   | lamin A/C                                                            | 1.50                                 | 9.95x10 <sup>-04</sup> |
| ACTB   | actin, beta                                                          | 1.48                                 | 7.37x10 <sup>-03</sup> |
| TIMP2  | Tissue inhibitor of metalloproteinase 2                              | 1.38                                 | 1.44x10 <sup>-2</sup>  |
| IGF1   | insulin-like growth factor 1 (somatomedin C)                         | 1.37                                 | 1.77x10 <sup>-03</sup> |
| MMP7   | Matrix metalloproteinase 7                                           | 1.34                                 | 6.34x10 <sup>-3</sup>  |
| MYBPC3 | myosin binding protein C, cardiac                                    | 1.29                                 | 2.93x10 <sup>-02</sup> |
| ITGA5  | integrin, alpha 5 (fibronectin receptor, alpha polypeptide)          | 1.28                                 | 3.42x10 <sup>-02</sup> |
|        |                                                                      | <b>Decreased</b>                     |                        |
| SGCA   | sarcoglycan, alpha (50kDa dystrophin-associated glycoprotein)        | -1.94                                | 8.27x10 <sup>-04</sup> |
| TNNI3  | troponin I type 3 (cardiac)                                          | -1.66                                | 2.39x10 <sup>-03</sup> |
| ITGA7  | integrin, alpha 7                                                    | -1.65                                | 6.78x10 <sup>-03</sup> |
| SGCG   | sarcoglycan, gamma (35kDa dystrophin-associated glycoprotein)        | -1.62                                | 1.11x10 <sup>-03</sup> |
| ADCY6  | adenylate cyclase 6                                                  | -1.59                                | 2.05x10 <sup>-03</sup> |
| MMP15  | matrix metalloproteinase 15                                          | -1.57                                | 1.43x10 <sup>-3</sup>  |
| PRKAB1 | protein kinase, AMP-activated, beta 1 non-catalytic subunit          | -1.54                                | 1.18x10 <sup>-2</sup>  |
| ATP2A2 | ATPase, Ca <sup>++</sup> transporting, cardiac muscle, slow twitch 2 | -1.47                                | 1.37x10 <sup>-02</sup> |
| ITGB6  | integrin, beta 6                                                     | -1.41                                | 3.48x10 <sup>-03</sup> |
| TGFB1  | transforming growth factor, beta 1                                   | -1.33                                | 2.41x10 <sup>-02</sup> |
| ADCY4  | adenylate cyclase 4                                                  | -1.31                                | 3.09x10 <sup>-03</sup> |
| MYH6   | myosin, heavy chain 6, cardiac muscle, alpha                         | -1.26                                | 2.40x10 <sup>-02</sup> |
| RYR2   | ryanodine receptor 2 (cardiac)                                       | -1.25                                | 2.84x10 <sup>-02</sup> |
| CACNG4 | calcium channel, voltage-dependent, gamma subunit 4                  | -1.24                                | 4.40x10 <sup>-02</sup> |

Changes in gene expression in MHC-TRAF2<sub>HC</sub> mice vs. LM control mice at 12 weeks of age identified by the KEGG functional pathway for cardiac hypertrophy/dilated cardiomyopathy were modified to include changes in extracellular matrix gene expression that have been linked to the development of dilated cardiomyopathy. Changes in gene expressed are displayed visually in Figure 6 in the manuscript.

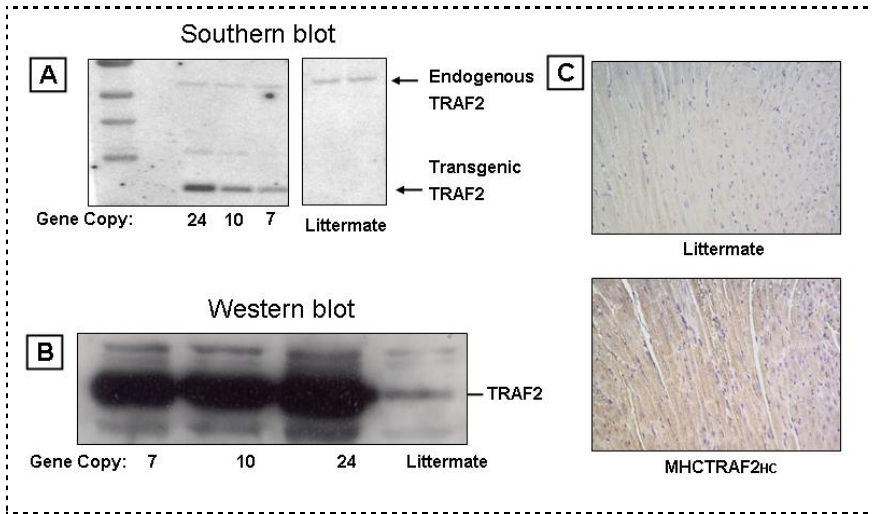

**Supplemental Figure 1:** Generation of transgenic mice overexpressing TRAF2 in the heart. (A) Representative southern blot showing three lines of mice overexpressing 7, 10 and 24 copies of the TRAF2 transgene in comparison to controls. (B) Western blot of TRAF2 protein expression in hearts of MHC-TRAF2 mice expressing 7, 10 and 24 copies of the TRAF2 transgene. (C) Representative immunohistochemical staining of littermate and MHC-TRAF2<sub>HC</sub> mouse hearts (100 x).

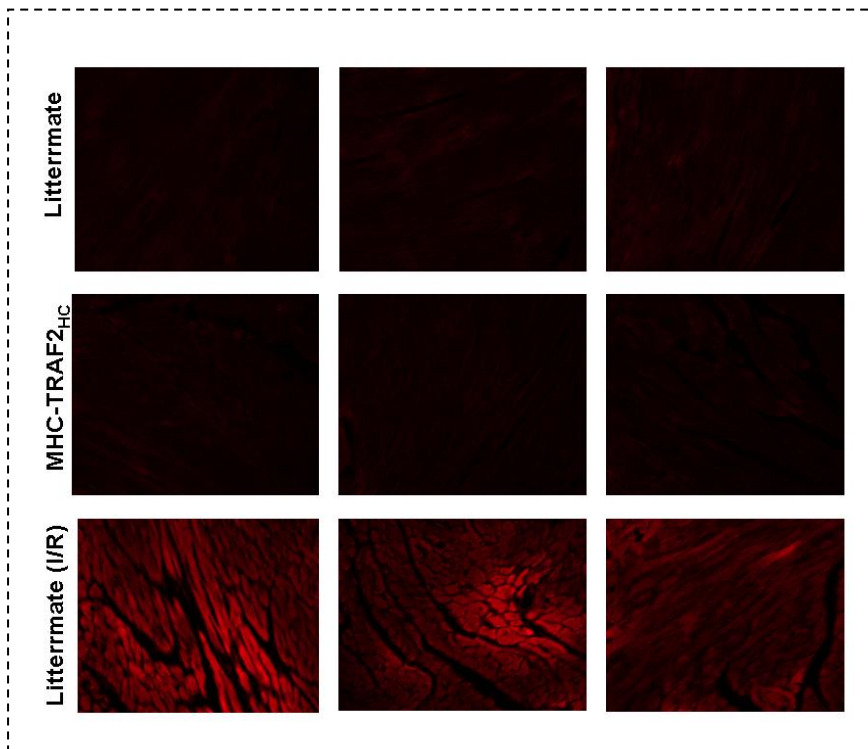

**Supplemental Figure 2:** Evans Blue dye uptake in littermate control and MHC-TRAF2<sub>HC</sub> mouse hearts. To determine the presence of absence of myocyte cell necrosis, 4 week littermate control and MHC-TRAF2<sub>HC</sub> mice were injected intraperitoneally with Evans Blue dye, the hearts excised, fixed and examined by fluorescence microscopy (200 x). As a positive control, littermate control mouse hearts were subjected to ischemia reperfusion injury ex vivo, and stained with Evan Blue dye as described.<sup>2</sup>

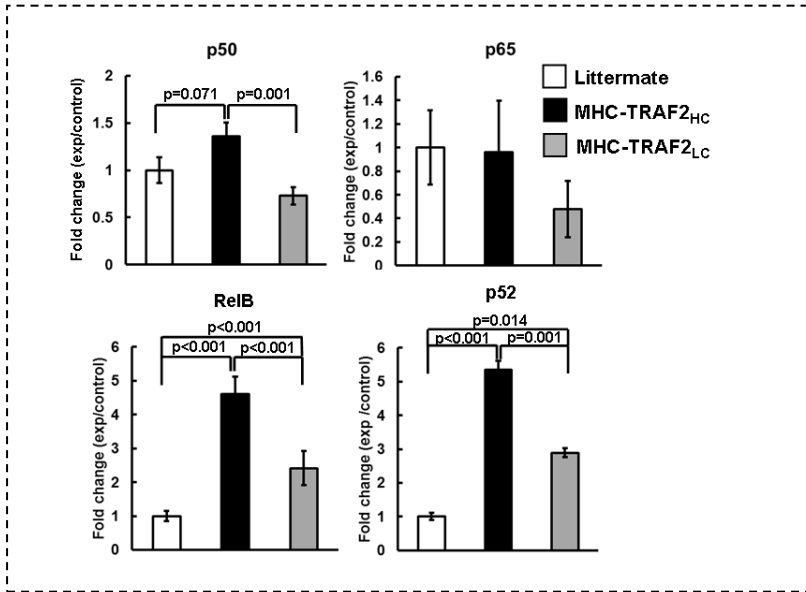

**Supplemental Figure 3: NF- $\kappa$ B subunits.** An NF- $\kappa$ B ELISA was performed on nuclear extracts from obtained from 12 week littermate control and MHC-TRAF<sub>2<sub>HC</sub></sub> mouse hearts (n = 6-9 hearts/group).

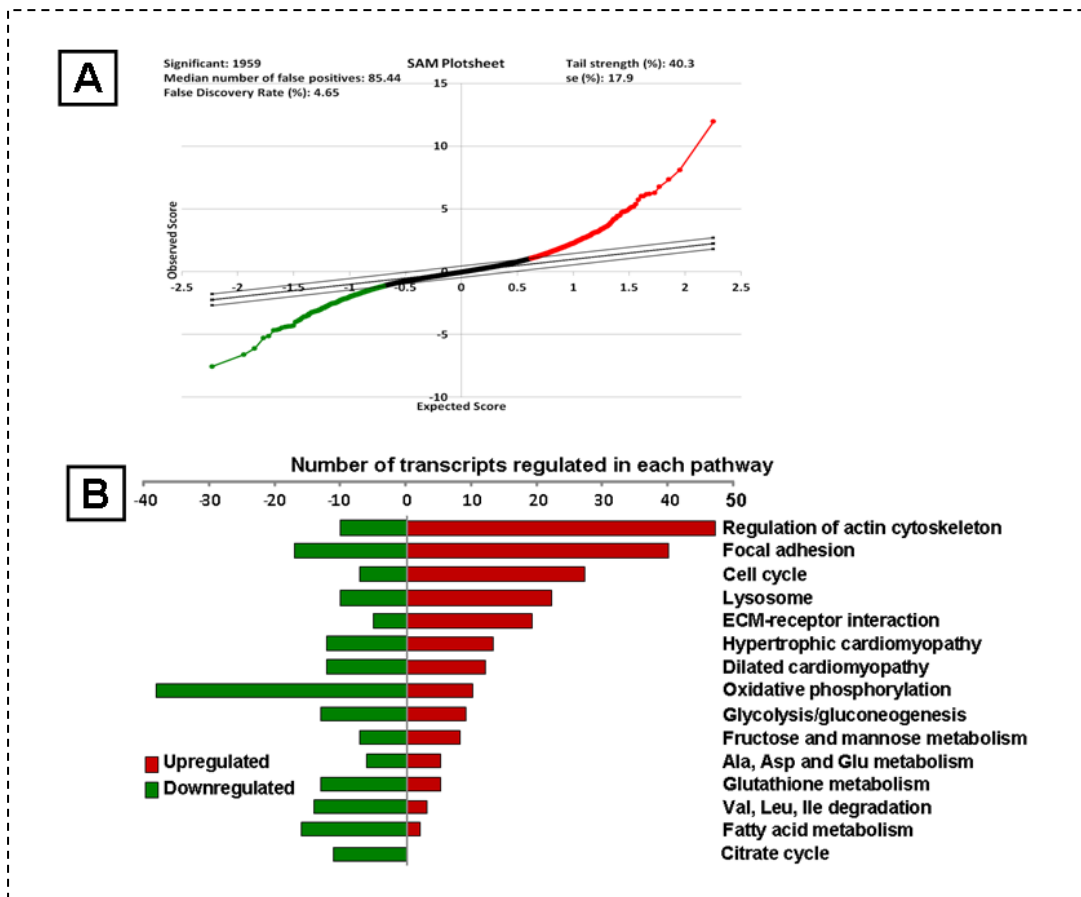

**Supplemental Figure 4: Transcriptional profiling.** (A) SAM plot of changes in gene expression in the 12 week MHC-TRAF<sub>2<sub>HC</sub></sub> mouse hearts compared to LM controls (n = 4 hearts/group). Genes that were significantly increased are denoted by red circles; genes that were significantly decreased are denoted by green circles. A false discovery rate (FDR) less than 5% was used for the SAM plots. (B) KEGG analysis of functional pathways that were significantly different in the MHC-TRAF<sub>2<sub>HC</sub></sub> compared to LM control hearts at 12 weeks of age.
